# Supplementary material for: Nucleolar-nucleoplasmic shuttling of TARG1 and its control by DNA damage-induced poly-ADP-ribosylation and by nucleolar transcription
Source: PubMed Central journal article supplement (PMC5928194; doi:10.1038/s41598-018-25137-w), 2018-04-30
Supplement: 41598_2018_25137_MOESM1_ESM.pdf [file 41598_2018_25137_MOESM1_ESM.pdf]

## Supplementary Information

### **Nucleolar-nucleoplasmic shuttling of TARG1 and its control by DNA damage-induced poly-ADP-ribosylation and by nucleolar transcription**

Mareike Bütepage<sup>1</sup>, Christian Preisinger<sup>2</sup>, Alexander von Kriegsheim<sup>3,9</sup>, Anja Scheufen<sup>1</sup>, Eva Lausberg<sup>1,9</sup>, Jinyu Li<sup>1,9</sup>, Ferdinand Kappes<sup>1,9</sup>, Regina Feederle<sup>4</sup>, Sabrina Ernst<sup>1,5</sup>, Laura Ecke<sup>1</sup>, Sarah Krieg<sup>1</sup>, Gerhard Müller-Newen<sup>1,5</sup>, Giulia Rossetti<sup>6,7,8</sup>, Karla Feijs<sup>1</sup>, Patricia Verheugd<sup>1</sup> and Bernhard Lüscher<sup>1,\*</sup>

<sup>1</sup> Institute of Biochemistry and Molecular Biology, Medical School, RWTH Aachen University, Pauwelsstraße 30, 52074 Aachen, Germany

<sup>2</sup> Proteomics Facility, Interdisciplinary Centre for Clinical Research (IZKF), Medical School, RWTH Aachen University, Pauwelsstraße 30, 52074 Aachen, Germany

<sup>3</sup> Systems Biology Ireland, Conway Institute, University College Dublin, Dublin 4, Ireland

<sup>4</sup> Institute for Diabetes and Obesity, Monoclonal Antibody Core Facility, Helmholtz Center Munich, German Research Center for Environmental Health, Ingolstädter Landstrasse 1, Neuherberg, Germany

<sup>5</sup> Immunohistochemistry and Confocal Microscopy Facility, Interdisciplinary Centre for Clinical Research (IZKF), Medical School, RWTH Aachen University, Pauwelsstraße 30, 52074 Aachen, Germany

<sup>6</sup> Computational Biomedicine, Institute for Advanced Simulation IAS-5 and Institute of Neuroscience and Medicine INM-9, Forschungszentrum Jülich, 52425 Jülich, Germany

<sup>7</sup> Jülich Supercomputing Centre, Forschungszentrum Jülich, 52425 Jülich, Germany

<sup>8</sup> Department of Oncology, Hematology and Stem Cell Transplantation, Medical School, RWTH Aachen University, Pauwelsstraße 30, 52074 Aachen, Germany

<sup>9</sup> current addresses: Edinburgh Cancer Research Centre, IGMM, University of Edinburgh, Edinburgh EH4 2XR, UK (AvK); Institute of Human Genetics, Medical School, RWTH Aachen University, Pauwelsstraße 30, 52074 Aachen, Germany (EL); College of Chemistry, Fuzhou University, 350116 Fuzhou, China (JL); Department of Biological Sciences, Xi'an Jiaotong-Liverpool University, No 111, Ren Ai Road, Dushu Lake Higher Education Town, Suzhou Industrial Park, Suzhou, 215123, P.R. China (FK)

\* Correspondence: luescher@rwth-aachen.de; Tel.: +49-241-8088850; Fax: +49-241-8082427; ORCID: 0000-0002-9622-8709.

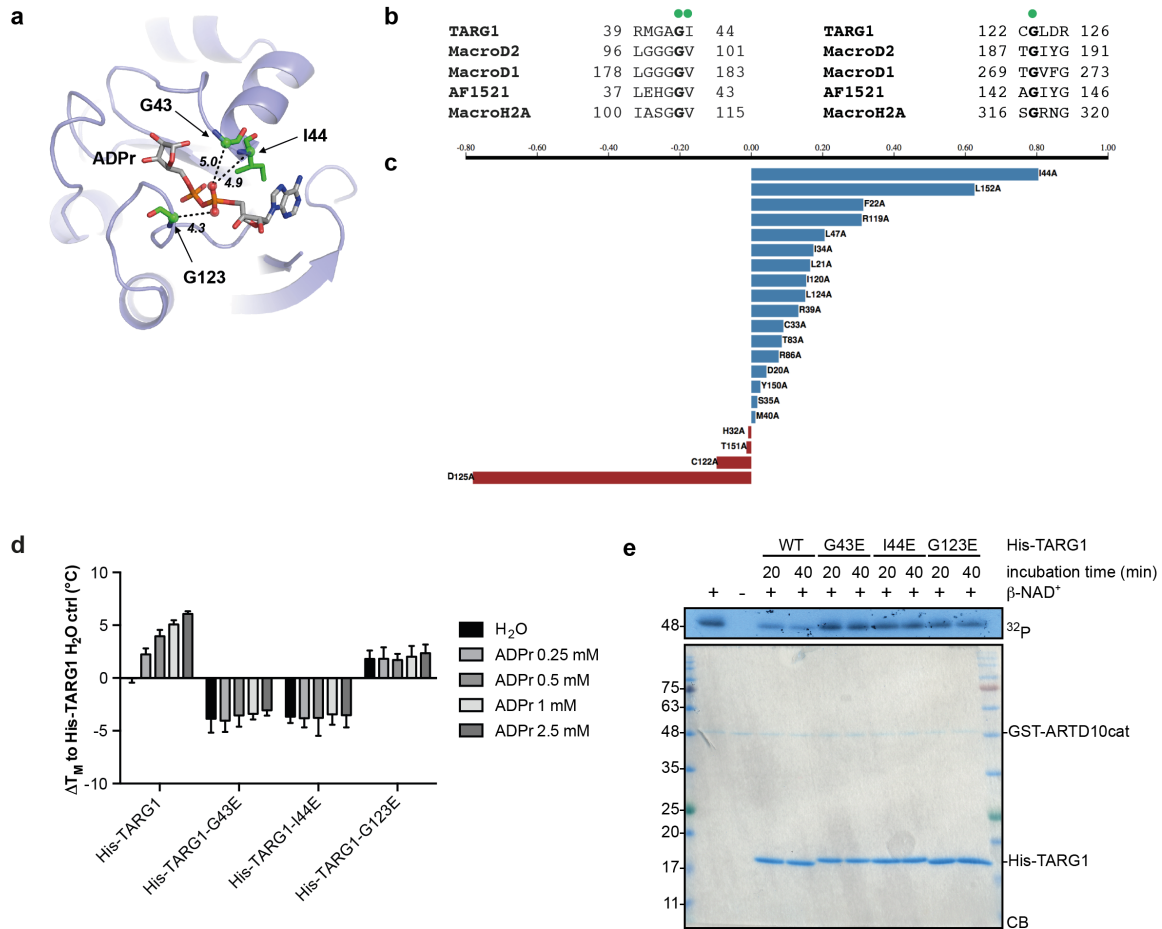

### Supplementary Figure S1: Establishment of ADPr binding-deficient TARG1 mutants

(a) NMR structure of TARG1/ADPr (PDB ID: 2L8R<sup>1</sup>). TARG1 and ADPr are shown in blue cartoon and gray stick models, respectively. The mutagenesis sites tested experimentally (G43, I44 and G123) are highlighted in green stick model. The closest distances (in Å) between the C $\alpha$  atoms of these residues and the oxygen atoms of ADPr phosphates are indicated by black dashed lines.

(b) Sequence alignments of macrodomains around the mutagenesis sites (G43, I44 and G123 of TARG1, indicated by green solid circles).

(c) *In silico* alanine scan and  $\Delta\Delta G$  values for ADPr binding.

(d) Thermal stability of TARG1 and mutants in the presence of ADPr. 2  $\mu$ M His-TARG1, His-TARG1-G43E, -I44E or -G123E were incubated with increasing amounts of ADPr (0.25 mM – 2.5 mM) and the fluorescent dye SYPRO orange. SYPRO orange fluorescence intensity was measured in a qPCR light cycler with a temperature gradient from 25°C to 95°C with temperature increments of 1°C/min. Melting temperatures were determined according to <sup>2</sup> and are presented as  $\Delta T_M$  (mean + SD of 3 experiments) to His-TARG1 H<sub>2</sub>O control (ctrl).

(e) Hydrolase activity of His-TARG1 and mutants. Immobilized GST-coupled ARTD10 catalytic domain was auto-modified in the presence of <sup>32</sup>P- $\beta$ -NAD<sup>+</sup> and incubated with His-TARG1 (WT) or His-TARG1-G43E, -I44E or -G123E for 20 or 40 min. Proteins were separated by SDS-PAGE. Removal of the incorporated radioactive label of ARTD10cat was monitored by auto-radiography (<sup>32</sup>P). CB: Coomassie blue.

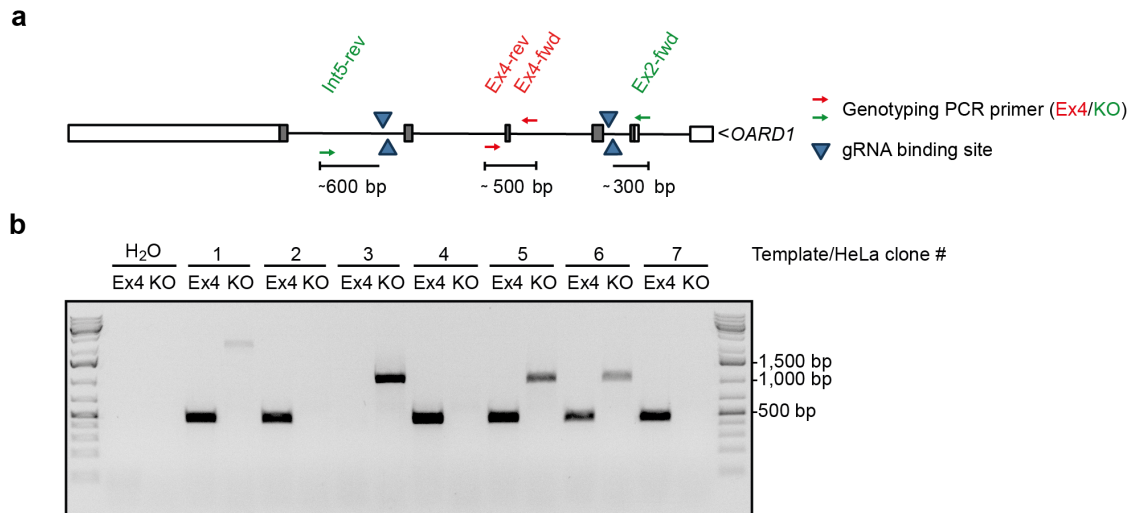

**Supplementary Figure S2: CRISPR-Cas9 *OARD1* knock-out strategy**

(a) Schematic representation of the *OARD1* locus on the reverse strand of chromosome 6 and knock-out strategy. HeLa cells were transfected with plasmids encoding for the Cas9 nickase (Cas9-D10A) and gRNAs targeting Cas9-D10A to the forward and the reverse strand in intron 2 and intron 5 each of the *OARD1* gene (blue triangles) resulting in deletion of exons 3-5. Genotyping of single cell clones was performed by genomic PCR. The wildtype allele was detected using the primer pair amplifying exon 4 (Ex4, red) while upon deletion of the gDNA-flanked fragment a PCR product of ~1,000 bp can be amplified using the primer pair Ex2-fwd/Int5-rev (KO, green).

(b) Exemplary agarose gel of genotyping PCR using genomic DNA samples from 7 different HeLa cell clones as a template and the primer pairs described in (A) for amplification of the wildtype (Ex4) and the knock-out (KO) allele. A complete knock-out was observed for clone 3.

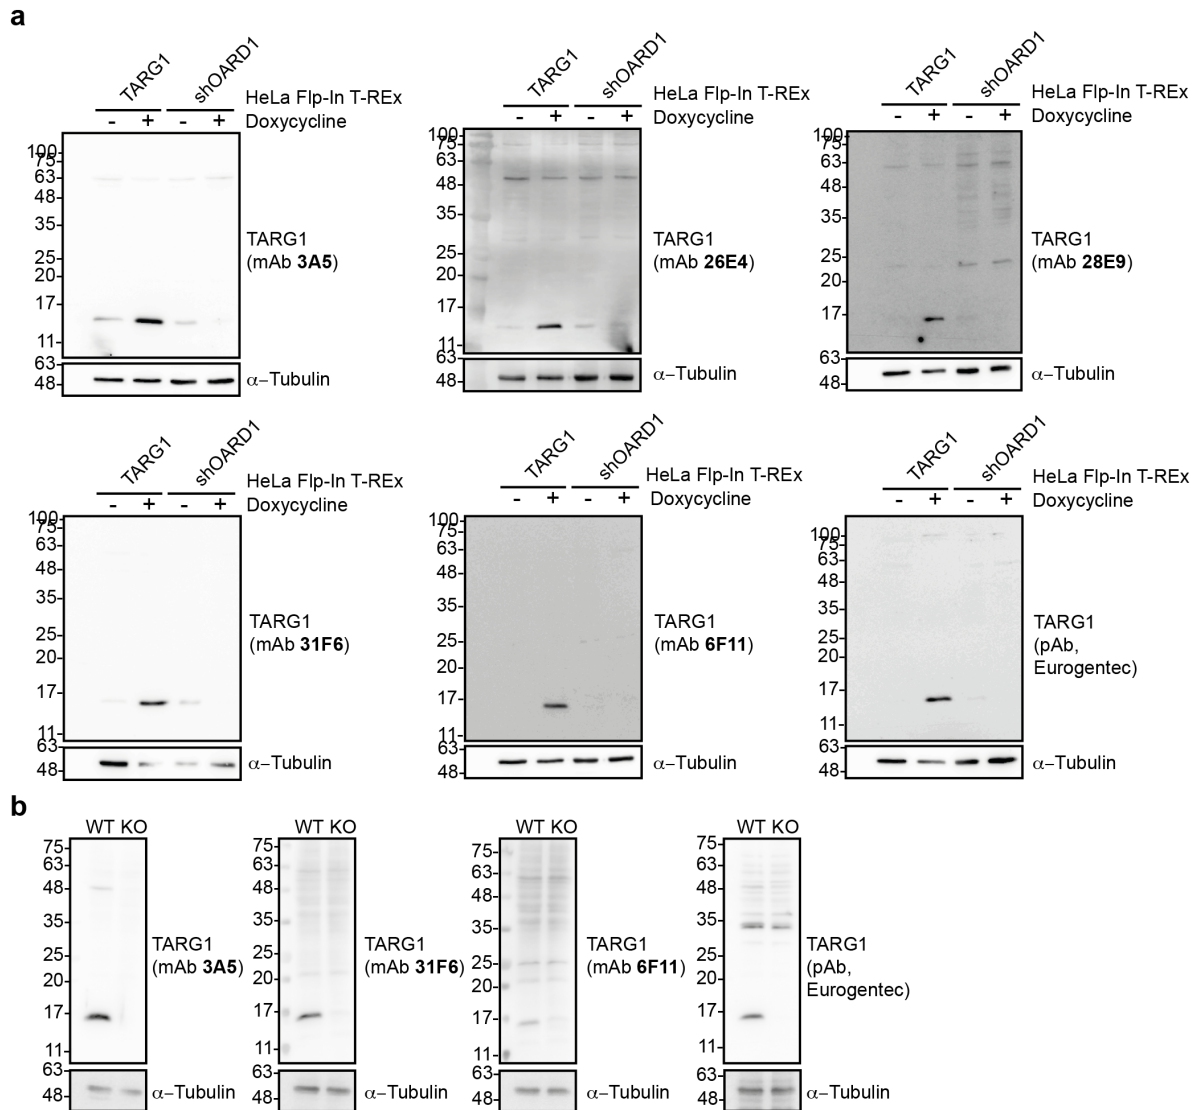

### Supplementary Figure S3: Validation of TARG1 antibodies

(a) TARG1 protein expression in whole cell lysates of HeLa Flp-In™ T-REx™ cells inducibly expressing either TARG1 or an shRNA against *OARD1* mRNA (shOARD1) upon doxycycline addition was analyzed by SDS-PAGE/Western blot with monoclonal antibodies generated against full-length TARG1 (3A5, rat; 26E4, mouse; 28E9, mouse; 31F6, mouse; 6F11, rat) or a polyclonal antibody raised against two peptides in the C-terminus of TARG1 (rabbit, Eurogentec).

(b) TARG1 protein expression in whole cell lysates of HeLa (WT) and HeLa *OARD1*<sup>-/-</sup> (KO; cl. 3) cells was analyzed by SDS-PAGE/Western blot with the antibodies described in (a).

(a and b) α-Tubulin levels were detected as a loading control. Full-length blots are presented in Supplementary Fig. S9.

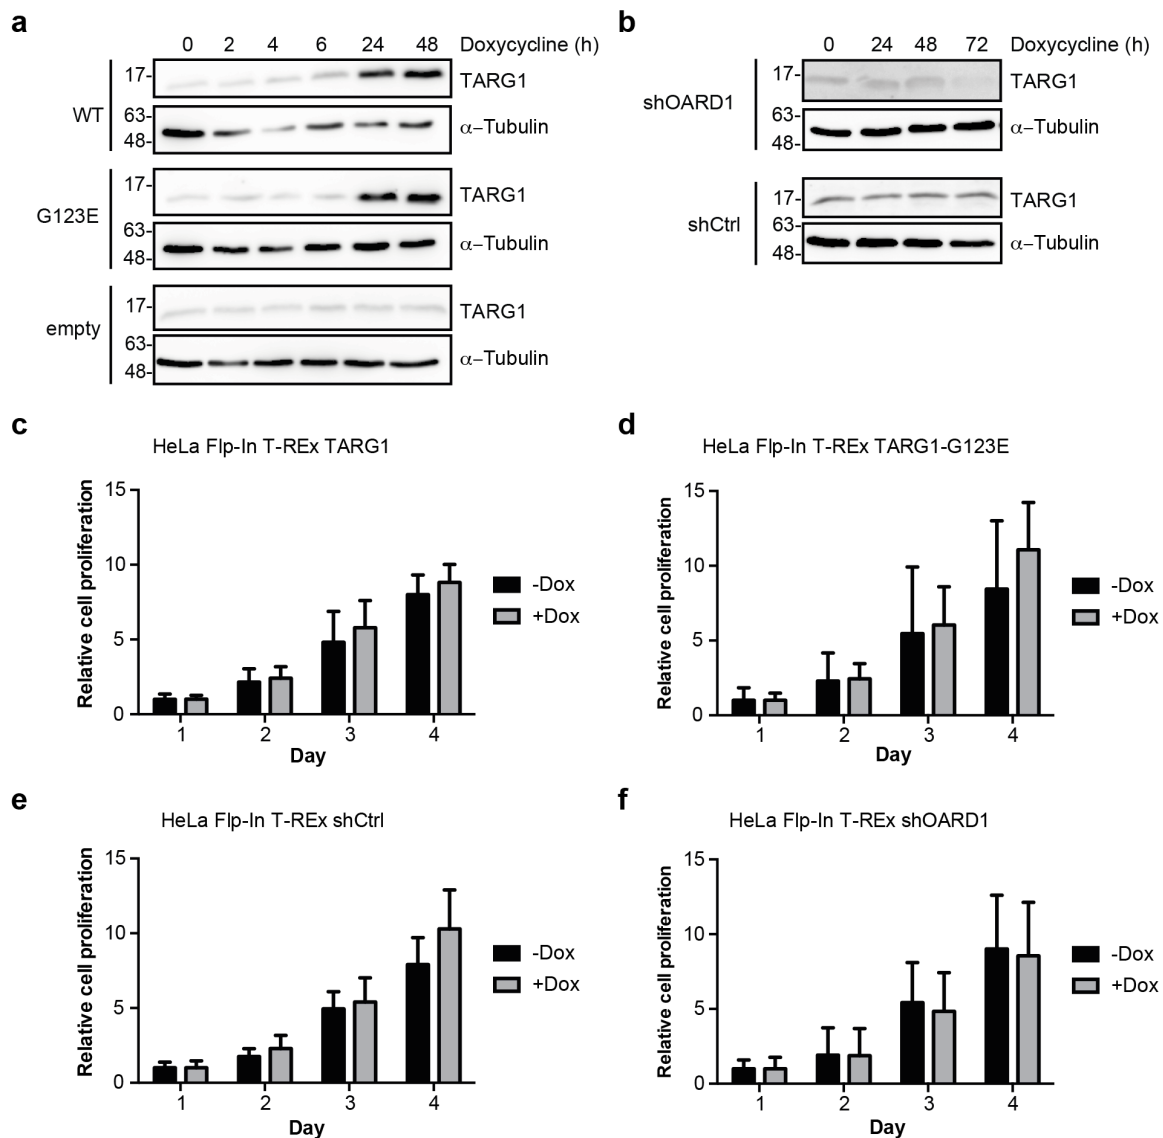

### Supplementary Figure S4: Cell proliferation analyses of HeLa cells with inducible overexpression or knock-down of TARG1

(a) HeLa Flp-In<sup>TM</sup> T-REx<sup>TM</sup> cell lines stably expressing TARG1 wildtype (WT), TARG1-G123E (G123E) or an empty vector control were treated with 500 ng/ml doxycycline for the indicated time points to induce transgene expression. Whole cell lysates were prepared and TARG1 protein expression analyzed by Western blotting using a polyclonal TARG1 antibody (Eurogentec). Exogenous TARG1 WT and G123E are detectable 24 h after doxycycline treatment while no increase in TARG1 expression is observed in the empty vector control.  $\alpha$ -Tubulin levels were detected as a loading control.

(b) HeLa Flp-In<sup>TM</sup> T-REx<sup>TM</sup> cell lines stably expressing an shRNA against *OARD1* mRNA (shOARD1) or a control shRNA (shCtrl) were treated with 500 ng/ml doxycycline for the indicated time points to induce shRNA expression. Whole cell lysates were prepared and TARG1 protein expression analyzed by Western blotting using a polyclonal TARG1 antibody (Eurogentec). Reduction in TARG1 expression was detected in HeLa cells expressing shOARD1 72 h after doxycycline induction but not in shCtrl expressing HeLa cells.  $\alpha$ -Tubulin levels were detected as a loading control.

(c-f) HeLa Flp-In<sup>TM</sup> T-REx<sup>TM</sup> cells inducibly expressing TARG1 (c), -G123E (d), shOARD1 (e) or shCtrl (f) were or were not treated with 500 ng/ml doxycycline (Dox) for 72 h to induce transgene expression or *OARD1* knock-down before seeding onto 96 well-plates. Cell viability was measured 1, 2, 3 and 4 days after seeding using the cell proliferation reagent WST-1 (mean  $\pm$  SD of 3 experiments).

(a and b) Full-length blots are presented in Supplementary Fig. S9.

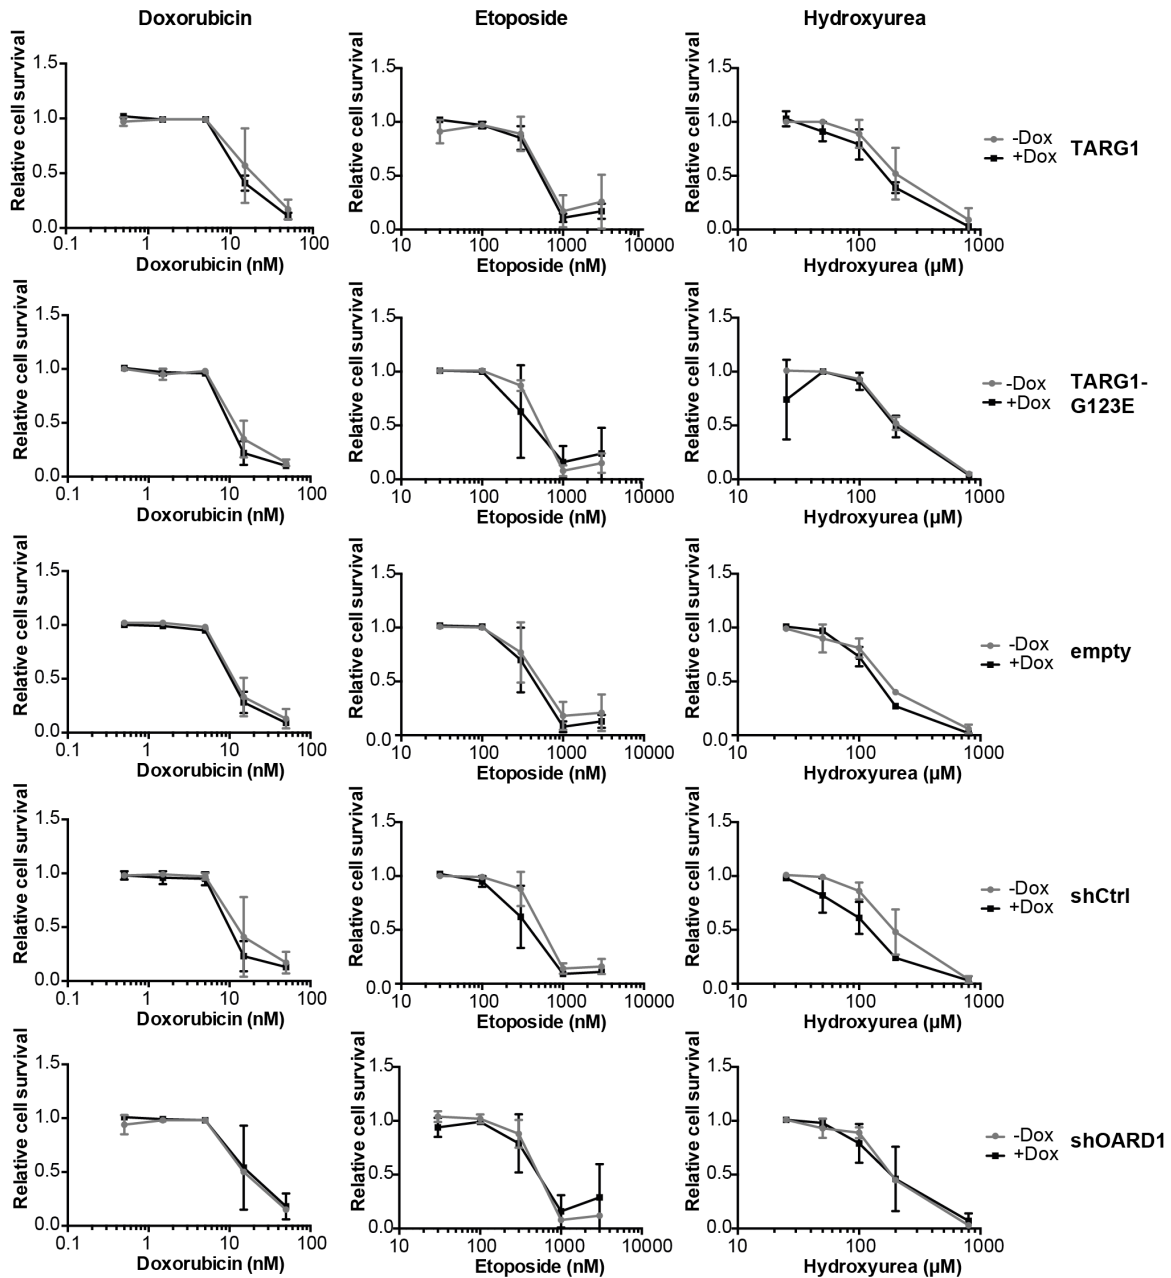

**Supplementary Figure S5: Sensitivity of HeLa cells with inducible overexpression or knock-down of TARG1 to DNA damaging agents**

HeLa Flp-In™ T-REx™ cells inducibly expressing TARG1, TARG1-G123E, an empty vector control (empty), shCtrl or shOARD1 were or were not treated with 500 ng/ml doxycycline (-/+Dox) for 72 h to induce transgene expression or *OARD1* knock-down before seeding the cells in 6-well plates in cell culture medium +/- doxycycline. 24 h after seeding, the cells were treated with doxorubicine for 24 h, or etoposide or hydroxyurea for 48 h at the indicated concentrations. Relative cell survival on day 4 after seeding was calculated as described in the supplementary methods section (mean ± SD of 2 biological replicates measured in duplicates).

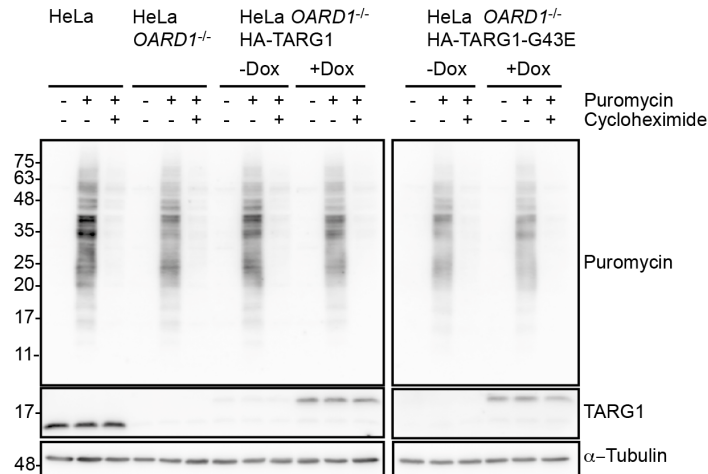

**Supplementary Figure S6: Translation activity of HeLa *OARD1* knock-out cells.**

Translation activity of HeLa *OARD1* knock-out cells was estimated by a puromycin incorporation assay<sup>3</sup>. HeLa, HeLa *OARD1*<sup>-/-</sup>, HeLa *OARD1*<sup>-/-</sup> HA-TARG1, HeLa *OARD1*<sup>-/-</sup> HA-TARG1-G43E were or were not induced by treatment with 100 ng/ml doxycycline as indicated. 48 h after doxycycline induction, the cells were treated with 10 µg/ml puromycin for 10 min to allow puromycin incorporation into nascent polypeptides. The cells were incubated for further 50 min at 37°C without puromycin and harvested. Puromycin incorporation was analyzed in whole cell lysates by SDS-PAGE/Western blot using a monoclonal puromycin antibody (12D10). Pre-treatment of the cells with 25 µg/ml cycloheximide blocked puromycin incorporation into nascent polypeptides. TARG1 protein expression was analyzed with the monoclonal TARG1 antibody 3A5. α-Tubulin was analyzed as a loading control. Full-length blots are presented in Supplementary Fig. S9.



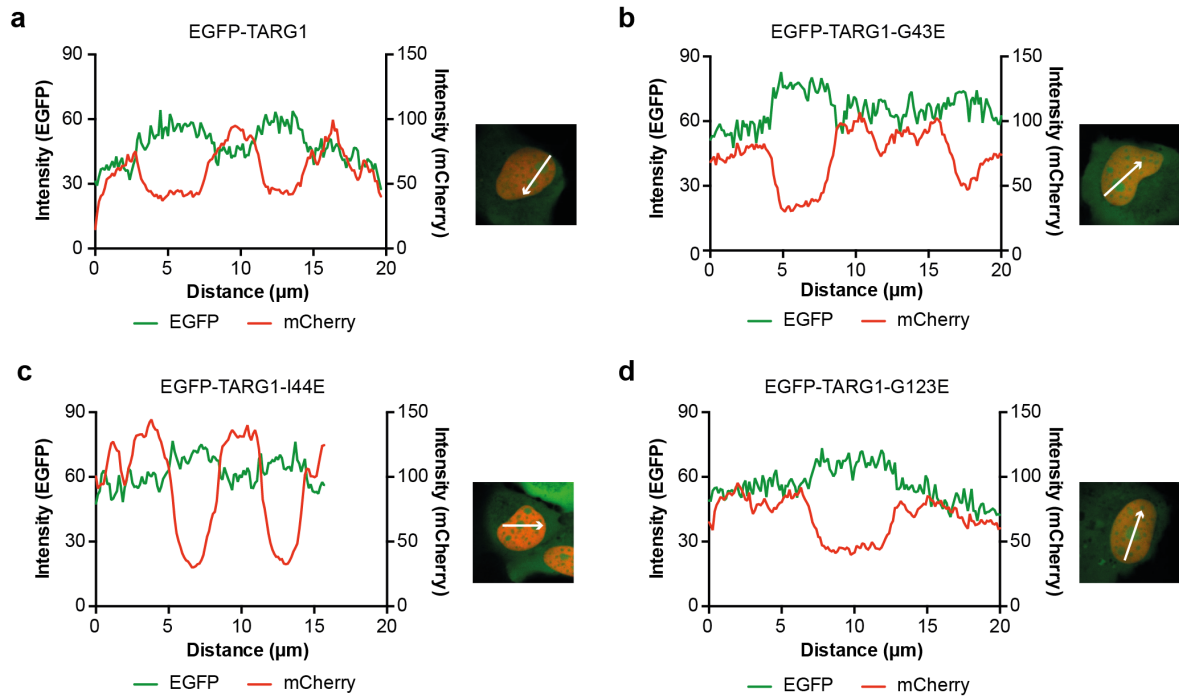

### Supplementary Figure S7

(a-d) Intensity profiles for EGFP and mCherry fluorescence signals of the images presented in Figure 3b along the depicted arrows.

**Belongs to Figure 1d:**

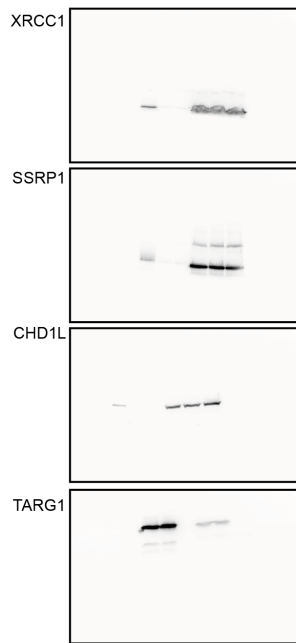

**Belongs to Figure 1e:**

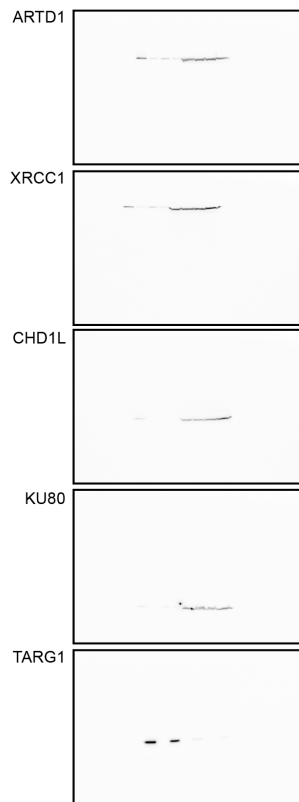

**Belongs to Figure 1f:**

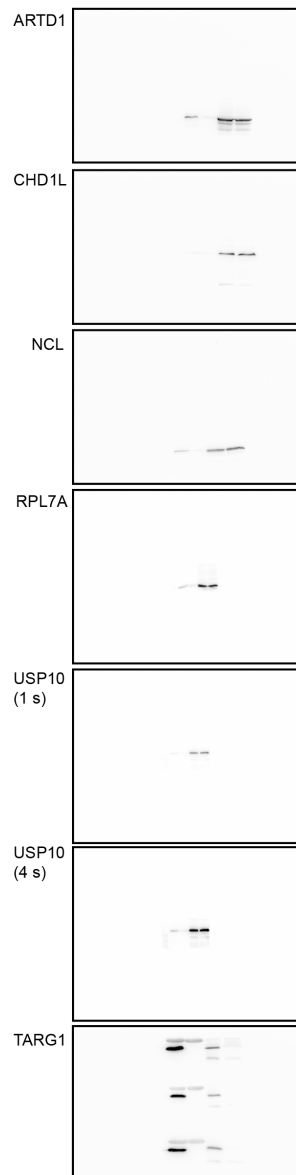

**Belongs to Figure 2a:**

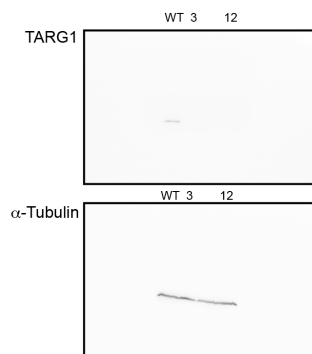

**Belongs to Figure 2c:**

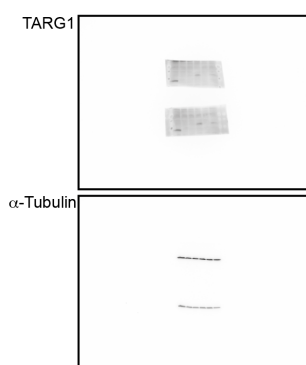

**Supplementary Figure S8**

Uncropped original images of Western blots are shown belonging to Figures 1d-f, 2a and 2c.

**Belongs to Figure S3a:**

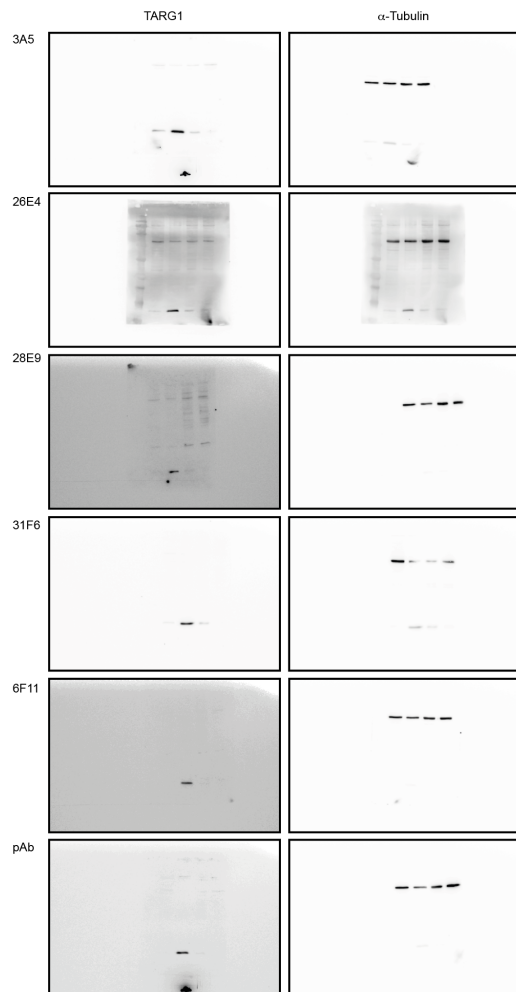

**Belongs to Figure S3b:**

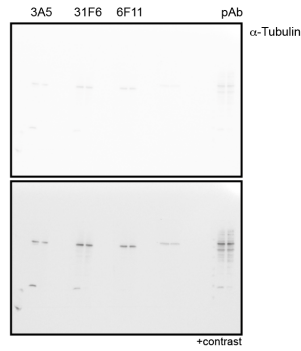

**Belongs to Figure S4a:**

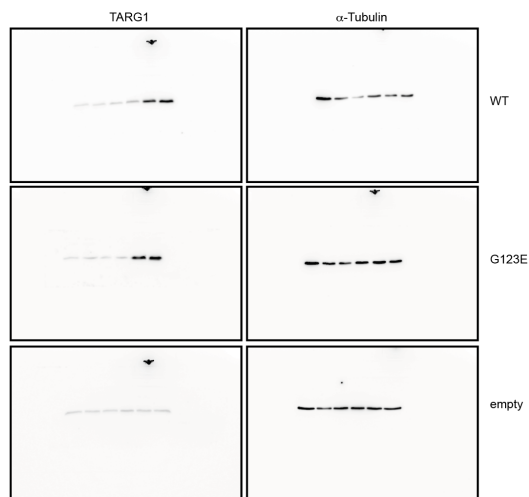

**Belongs to Figure S4b:**

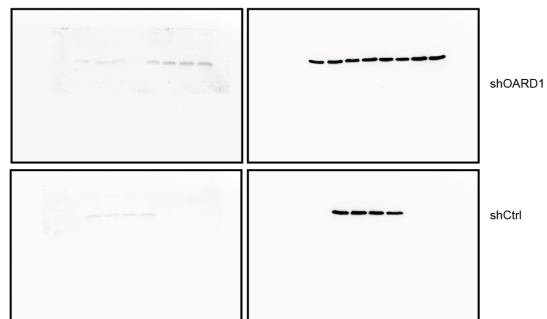

**Belongs to Figure S6:**

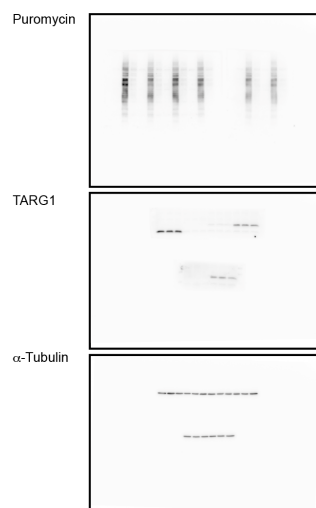

**Supplementary Figure S9**

Uncropped original images of Western blots are shown belonging to Figures S3, S4 and S6.

## Supplementary Table S1

### Proteins enriched in the TAP-pulldown experiments +/- olaparib (minimum two-fold).

The raw mass spectrometry data was analysed using MaxQuant as described in materials and methods. The output file “proteinGroups.txt” was used for further analysis. The ratio was calculated as the mean of all LFQ intensities of TAP-TARG/empty TAP-vector. If no LFQ intensity was reported the levels of “0” were set to “1” in order to avoid DIV/0 errors when calculating the ratio.

### TAP-Purification of TARG/OARD1 minus Olaparib

| Majority protein IDs | Protein names                                        | Gene names | Razor + unique peptides | Unique peptides | log <sub>2</sub> LFQ ratio | ttest    |
|----------------------|------------------------------------------------------|------------|-------------------------|-----------------|----------------------------|----------|
| Q01831               | DNA repair protein complementing XP-C cells          | XPC        | 7                       | 7               | 31.74                      | 3.80E-04 |
| Q72780-3             | Filamin-A-interacting protein 1                      | FILIP1     | 1                       | 1               | 29.83                      | 5.42E-03 |
| O75531               | Barrier-to-autointegration factor                    | BANF1      | 5                       | 5               | 28.59                      | 1.63E-03 |
| F5H8D7               | DNA repair protein XRCC1                             | XRCC1      | 8                       | 8               | 28.23                      | 1.34E-06 |
| Q86WJ1-2             | Chromodomain-helicase-DNA-binding protein 1-like     | CHD1L      | 15                      | 1               | 28.19                      | 3.29E-05 |
| Q14191               | Werner syndrome ATP-dependent helicase               | WRN        | 14                      | 14              | 28.03                      | 7.75E-09 |
| Q8NC56               | LEM domain-containing protein 2                      | LEM2       | 6                       | 6               | 26.81                      | 2.00E-03 |
| Q5TEC6               | Histone H3.3C                                        | HIST2H3P52 | 1                       | 1               | 26.77                      | 1.21E-03 |
| P62979               | Ubiquitin-40S ribosomal protein S27a                 | RPS27A     | 3                       | 3               | 26.48                      | 2.49E-03 |
| Q13472-2             | DNA topoisomerase 3-alpha                            | TOP3A      | 4                       | 4               | 26.29                      | 7.00E-05 |
| P42166               | Lamina-associated polypeptide 2, isoform alpha       | TMPO       | 2                       | 2               | 24.94                      | 1.32E-04 |
| Q9Y530               | O-acetyl-ADP-ribose deacetylase 1                    | OARD1      | 28                      | 4               | 16.68                      | 1.44E-03 |
| P12956               | X-ray repair cross-complementing protein 6           | XRCC6      | 44                      | 44              | 11.86                      | 2.09E-04 |
| P09874               | Poly [ADP-ribose] polymerase 1                       | PARP1      | 86                      | 86              | 8.59                       | 2.61E-04 |
| A0A0C4DGA6           | Helicase-like transcription factor                   | HLTF       | 28                      | 28              | 8.51                       | 2.22E-03 |
| P13010               | X-ray repair cross-complementing protein 5           | XRCC5      | 38                      | 38              | 7.08                       | 1.61E-04 |
| P49916-3             | DNA ligase 3                                         | LIG3       | 27                      | 27              | 6.13                       | 8.23E-05 |
| P11388               | DNA topoisomerase 2-alpha                            | TOP2A      | 5                       | 5               | 5.66                       | 5.68E-03 |
| P35244               | Replication protein A 14 kDa subunit                 | RPA3       | 4                       | 4               | 5.27                       | 9.17E-03 |
| Q08945               | FACT complex subunit SSRP1                           | SSRP1      | 44                      | 44              | 5.12                       | 1.43E-04 |
| Q9Y5B9               | FACT complex subunit SPT16                           | SUPT16H    | 79                      | 79              | 5.09                       | 6.31E-08 |
| Q93077               | Histone H2A type 1-C                                 | HIST1H2AC  | 2                       | 2               | 4.85                       | 9.89E-03 |
| Q9BUH6               | Uncharacterized protein C9orf142                     | C9orf142   | 7                       | 7               | 4.76                       | 2.16E-03 |
| P05412               | Transcription factor AP-1                            | JUN        | 5                       | 4               | 4.74                       | 8.26E-04 |
| Q8N450               | Coiled-coil domain-containing protein 82             | CCDC82     | 6                       | 6               | 4.53                       | 1.25E-04 |
| Q01105-3             | Protein SET                                          | SET        | 2                       | 2               | 4.41                       | 4.64E-08 |
| P17535               | Transcription factor jun-D                           | JUND       | 2                       | 2               | 4.18                       | 8.04E-03 |
| P39880-3             | Homeobox protein cut-like 1                          | CUX1       | 33                      | 33              | 4.14                       | 6.18E-05 |
| P35250               | Replication factor C subunit 2                       | RFC2       | 3                       | 3               | 4.13                       | 1.15E-07 |
| P62805               | Histone H4                                           | HIST1H4A   | 12                      | 12              | 3.88                       | 1.43E-03 |
| J3QSH4               | Vascular endothelial zinc finger 1                   | VEZF1      | 4                       | 3               | 3.84                       | 3.65E-04 |
| K7EK07               | Histone H3                                           | H3F3B      | 6                       | 2               | 3.82                       | 3.06E-04 |
| Q99878               | Histone H2A type 1-J                                 | HIST1H2AJ  | 6                       | 2               | 3.70                       | 6.40E-04 |
| Q65PF0               | Atherin                                              | SAMD1      | 13                      | 13              | 3.66                       | 4.34E-05 |
| P78527               | DNA-dependent protein kinase catalytic subunit       | PRKDC      | 135                     | 135             | 3.32                       | 2.82E-04 |
| Q71UI9               | Histone H2A.V                                        | H2AFV      | 3                       | 3               | 3.29                       | 9.53E-03 |
| Q99879               | Histone H2B type 1-M                                 | HIST1H2BM  | 10                      | 2               | 2.92                       | 3.33E-04 |
| P35251-2             | Replication factor C subunit 1                       | RFC1       | 5                       | 5               | 2.79                       | 1.35E-04 |
| Q99627-2             | COP9 signalosome complex subunit 8                   | COPS8      | 2                       | 2               | 2.67                       | 9.02E-03 |
| P50402               | Emerin                                               | EMD        | 10                      | 10              | 2.56                       | 2.06E-03 |
| P40937-2             | Replication factor C subunit 5                       | RFC5       | 3                       | 3               | 2.53                       | 6.08E-04 |
| P40938-2             | Replication factor C subunit 3                       | RFC3       | 3                       | 3               | 2.34                       | 6.08E-09 |
| Q92522               | Histone H1x                                          | H1FX       | 6                       | 6               | 2.31                       | 2.26E-03 |
| Q00059               | Transcription factor A, mitochondrial                | TFAM       | 17                      | 17              | 2.24                       | 2.42E-05 |
| P47914               | 60S ribosomal protein L29                            | RPL29      | 4                       | 4               | 2.08                       | 8.31E-04 |
| P16403               | Histone H1.2                                         | HIST1H1C   | 13                      | 3               | 2.08                       | 6.14E-06 |
| P42167               | Lamina-associated polypeptide 2, isoforms beta/gamma | TMPO       | 10                      | 4               | 1.81                       | 4.33E-04 |
| Q8WXI9               | Transcriptional repressor p66-beta                   | GATAD2B    | 5                       | 4               | 1.79                       | 1.43E-03 |
| P46777               | 60S ribosomal protein L5                             | RPL5       | 13                      | 13              | 1.72                       | 1.78E-03 |
| C9JTT7               | Replication factor C subunit 4                       | RFC4       | 4                       | 4               | 1.67                       | 1.01E-04 |
| P39023               | 60S ribosomal protein L3                             | RPL3       | 19                      | 19              | 1.66                       | 2.62E-03 |
| P62424               | 60S ribosomal protein L7a                            | RPL7A      | 12                      | 12              | 1.62                       | 6.32E-04 |
| Q07020-2             | 60S ribosomal protein L18                            | RPL18      | 6                       | 6               | 1.62                       | 1.78E-03 |
| P61313               | 60S ribosomal protein L15                            | RPL15      | 10                      | 10              | 1.60                       | 2.46E-04 |
| E9PBF6               | Lamin-B1                                             | LMNB1      | 7                       | 7               | 1.57                       | 3.03E-03 |
| P30050               | 60S ribosomal protein L12                            | RPL12      | 6                       | 6               | 1.56                       | 3.43E-03 |
| Q02878               | 60S ribosomal protein L6                             | RPL6       | 10                      | 10              | 1.55                       | 1.44E-03 |
| P18124               | 60S ribosomal protein L7                             | RPL7       | 10                      | 10              | 1.52                       | 1.21E-03 |
| F8VW21               | 60S acidic ribosomal protein P0                      | RPLP0      | 6                       | 6               | 1.51                       | 6.38E-04 |

|          |                                              |        |    |    |      |          |
|----------|----------------------------------------------|--------|----|----|------|----------|
| P62917   | 60S ribosomal protein L8                     | RPL8   | 11 | 11 | 1.51 | 4.29E-03 |
| P49207   | 60S ribosomal protein L34                    | RPL34  | 5  | 5  | 1.50 | 7.71E-03 |
| P19338   | Nucleolin                                    | NCL    | 25 | 25 | 1.49 | 6.09E-04 |
| J3QR09   | Ribosomal protein L19                        | RPL19  | 9  | 9  | 1.42 | 1.08E-03 |
| MOR3D6   | 60S ribosomal protein L18a                   | RPL18A | 5  | 5  | 1.41 | 9.55E-03 |
| P36578   | 60S ribosomal protein L4                     | RPL4   | 16 | 16 | 1.38 | 4.87E-03 |
| P62750   | 60S ribosomal protein L23a                   | RPL23A | 11 | 11 | 1.34 | 7.29E-05 |
| Q9Y3U8   | 60S ribosomal protein L36                    | RPL36  | 4  | 4  | 1.33 | 4.55E-03 |
| D6RAN4   | 60S ribosomal protein L9                     | RPL9   | 9  | 9  | 1.27 | 9.32E-04 |
| P05387   | 60S acidic ribosomal protein P2              | RPLP2  | 4  | 3  | 1.26 | 3.21E-04 |
| P67809   | Nuclease-sensitive element-binding protein 1 | YBX1   | 8  | 6  | 1.16 | 2.13E-03 |
| P06748-2 | Nucleophosmin                                | NPM1   | 9  | 9  | 1.05 | 9.50E-03 |

## TAP-Purification of TARG/OARD1 plus Olaparib

| Majority protein IDs | Protein names                                          | Gene names | Razor + unique peptides | Unique peptides | log <sub>2</sub> LFC | ttest    |
|----------------------|--------------------------------------------------------|------------|-------------------------|-----------------|----------------------|----------|
| H7C2W9               | 60S ribosomal protein L31                              | RPL31      | 3                       | 3               | 29.75                | 7.81E-06 |
| P05386               | 60S acidic ribosomal protein P1                        | RPLP1      | 2                       | 2               | 28.31                | 8.34E-04 |
| Q96P11               | Putative methyltransferase NSUN5                       | NSUN5      | 10                      | 10              | 28.18                | 2.49E-04 |
| Q9NR30-2             | Nucleolar RNA helicase 2                               | DDX21      | 11                      | 10              | 28.18                | 6.39E-07 |
| Q7L2E3-3             | Putative ATP-dependent RNA helicase DHX30              | DHX30      | 11                      | 11              | 27.62                | 7.44E-09 |
| P98179               | Putative RNA-binding protein 3                         | RBM3       | 3                       | 3               | 27.29                | 2.36E-04 |
| Q8IY37               | Probable ATP-dependent RNA helicase DHX37              | DHX37      | 7                       | 7               | 27.28                | 2.42E-04 |
| Q98Q67               | Glutamate-rich WD repeat-containing protein 1          | GRWD1      | 4                       | 4               | 27.22                | 1.77E-04 |
| A0A0B4J220           |                                                        |            | 3                       | 3               | 26.90                | 8.95E-05 |
| E5RJU9               | Protein LYRIC                                          | MTDH       | 5                       | 5               | 26.88                | 9.09E-03 |
| F8WB55               | 60S ribosomal protein L35a                             | RPL35A     | 2                       | 2               | 26.72                | 1.10E-05 |
| Q9NUL7               | Probable ATP-dependent RNA helicase DDX28              | DDX28      | 4                       | 4               | 26.63                | 1.13E-04 |
| Q9H501               | ESF1 homolog                                           | ESF1       | 5                       | 5               | 26.61                | 1.91E-04 |
| P11387               | DNA topoisomerase 1                                    | TOP1       | 5                       | 5               | 26.61                | 5.51E-07 |
| Q99755-2             | Phosphatidylinositol 4-phosphate 5-kinase type-1 alpha | PIP5K1A    | 3                       | 3               | 26.48                | 7.26E-07 |
| O14979-3             | Heterogeneous nuclear ribonucleoprotein D-like         | HNRPDL     | 3                       | 3               | 26.44                | 2.46E-03 |
| Q8TDN6               | Ribosome biogenesis protein BRX1 homolog               | BRX1       | 3                       | 3               | 26.36                | 2.10E-03 |
| Q9H6F5               | Coiled-coil domain-containing protein 86               | CCDC86     | 2                       | 2               | 26.10                | 2.01E-04 |
| Q9NVN8               | Guanine nucleotide-binding protein-like 3-like protein | GNL3L      | 4                       | 4               | 25.92                | 3.39E-06 |
| Q9UL40               | Zinc finger protein 346                                | ZNF346     | 3                       | 3               | 25.83                | 5.69E-09 |
| Q96GA3               | Protein LTV1 homolog                                   | LTV1       | 3                       | 3               | 25.62                | 1.32E-05 |
| R9WNI0               | Fragile X mental retardation protein 1                 | FMR1       | 3                       | 3               | 25.57                | 6.22E-03 |
| Q8WU90               | Zinc finger CCCH domain-containing protein 15          | ZC3H15     | 3                       | 3               | 25.52                | 1.89E-06 |
| A0A087X1Q1           | Cellular tumor antigen p53                             | TP53       | 2                       | 2               | 25.34                | 7.66E-04 |
| S4R3G0               | Serine/arginine-rich splicing factor 9                 | SRSF9      | 2                       | 2               | 25.31                | 7.36E-07 |
| F8WDT8               | Probable ATP-dependent RNA helicase DDX56              | DDX56      | 2                       | 2               | 25.28                | 5.63E-07 |
| Q9Y222-2             | Protein MTO1 homolog, mitochondrial                    | MTO1       | 4                       | 4               | 24.89                | 8.77E-04 |
| Q5JR04               | Putative helicase MOV-10                               | MOV10      | 3                       | 3               | 24.88                | 6.93E-05 |
| H7C446               | Suppressor of SWI4 1 homolog                           | PPAN       | 2                       | 2               | 24.87                | 5.66E-06 |
| HOYFD2               | Protein KRI1 homolog                                   | KRI1       | 2                       | 2               | 24.68                | 9.72E-06 |
| Q49A26-5             | Putative oxidoreductase GLYR1                          | GLYR1      | 1                       | 1               | 23.38                | 1.56E-06 |
| Q9Y530               | O-acetyl-ADP-ribose deacetylase 1                      | OARD1      | 25                      | 3               | 12.37                | 4.24E-10 |
| P39023               | 60S ribosomal protein L3                               | RPL3       | 13                      | 13              | 4.90                 | 1.03E-03 |
| P06748-2             | Nucleophosmin                                          | NPM1       | 9                       | 9               | 4.41                 | 1.23E-03 |
| P46779-4             | 60S ribosomal protein L28                              | RPL28      | 4                       | 4               | 4.18                 | 2.98E-05 |
| Q59GN2               | Putative 60S ribosomal protein L39-like 5              | RPL39P5    | 2                       | 2               | 4.07                 | 2.06E-04 |
| P61353               | 60S ribosomal protein L27                              | RPL27      | 7                       | 7               | 4.06                 | 8.71E-04 |
| E7EPB3               | 60S ribosomal protein L14                              | RPL14      | 2                       | 2               | 4.05                 | 2.80E-04 |
| Q02878               | 60S ribosomal protein L6                               | RPL6       | 15                      | 15              | 4.03                 | 3.87E-04 |
| P36578               | 60S ribosomal protein L4                               | RPL4       | 15                      | 15              | 3.90                 | 7.82E-04 |
| P46777               | 60S ribosomal protein L5                               | RPL5       | 12                      | 12              | 3.88                 | 2.72E-05 |
| MOR3D6               | 60S ribosomal protein L18a                             | RPL18A     | 5                       | 5               | 3.87                 | 1.28E-04 |
| Q96AG4               | Leucine-rich repeat-containing protein 59              | LRRC59     | 11                      | 11              | 3.85                 | 3.93E-07 |
| P40429               | 60S ribosomal protein L13a                             | RPL13A     | 7                       | 1               | 3.79                 | 6.94E-05 |
| E9PKZ0               | 60S ribosomal protein L8                               | RPL8       | 5                       | 5               | 3.77                 | 1.49E-03 |
| Q9Y3U8               | 60S ribosomal protein L36                              | RPL36      | 4                       | 4               | 3.70                 | 3.41E-04 |
| ESRI99               | 60S ribosomal protein L30                              | RPL30      | 2                       | 2               | 3.69                 | 6.65E-04 |
| P62424               | 60S ribosomal protein L7a                              | RPL7A      | 9                       | 9               | 3.61                 | 2.11E-03 |
| P16403               | Histone H1.2                                           | HIST1H1C   | 3                       | 3               | 3.54                 | 7.88E-06 |
| E9PF19               | Transducin beta-like protein 2                         | TBL2       | 3                       | 3               | 3.53                 | 8.19E-03 |
| O95470               | Sphingosine-1-phosphate lyase 1                        | SGPL1      | 7                       | 7               | 3.47                 | 8.27E-06 |
| P18124               | 60S ribosomal protein L7                               | RPL7       | 14                      | 14              | 3.46                 | 4.97E-04 |
| E7EQV9               | Ribosomal protein L15                                  | RPL15      | 8                       | 8               | 3.44                 | 1.30E-03 |
| P10412               | Histone H1.4                                           | HIST1H1E   | 13                      | 4               | 3.38                 | 2.39E-06 |
| P35251-2             | Replication factor C subunit 1                         | RFC1       | 7                       | 7               | 3.37                 | 1.71E-03 |
| P47914               | 60S ribosomal protein L29                              | RPL29      | 3                       | 3               | 3.36                 | 2.50E-04 |
| O00425               | Insulin-like growth factor 2 mRNA-binding protein 3    | IGF2BP3    | 11                      | 10              | 3.36                 | 3.05E-03 |
| P35250               | Replication factor C subunit 2                         | RFC2       | 5                       | 5               | 3.35                 | 6.33E-04 |
| P46778               | 60S ribosomal protein L21                              | RPL21      | 6                       | 6               | 3.34                 | 9.27E-05 |
| P62857               | 40S ribosomal protein S28                              | RPS28      | 4                       | 4               | 3.33                 | 9.42E-04 |
| J3KT29               | 60S ribosomal protein L23                              | RPL23      | 10                      | 10              | 3.32                 | 2.09E-05 |
| Q8IZ69-2             | tRNA (uracil-5-)-methyltransferase homolog A           | TRMT2A     | 5                       | 5               | 3.27                 | 3.25E-04 |

|            |                                                        |         |    |    |      |          |
|------------|--------------------------------------------------------|---------|----|----|------|----------|
| Q07020-2   | 60S ribosomal protein L18                              | RPL18   | 7  | 7  | 3.26 | 2.14E-04 |
| J3QR09     | Ribosomal protein L19                                  | RPL19   | 7  | 7  | 3.26 | 5.59E-05 |
| P26373     | 60S ribosomal protein L13                              | RPL13   | 13 | 13 | 3.25 | 4.97E-04 |
| P40937-2   | Replication factor C subunit 5                         | RFC5    | 5  | 3  | 3.23 | 1.11E-03 |
| P16989     | Y-box-binding protein 3                                | YBX3    | 7  |    | 3.23 | 6.55E-05 |
| P05388     | 60S acidic ribosomal protein P0                        | RPLP0   | 11 | 11 | 3.21 | 3.76E-03 |
| Q9BVJ6     | U3 small nucleolar RNA-associated protein 14 homolog A | UTP14A  | 12 | 12 | 3.20 | 8.45E-03 |
| A0A087WYC8 | Regulator of nonsense transcripts 3B                   | UPF3B   | 2  | 2  | 3.19 | 1.93E-03 |
| C9J4Z3     | 60S ribosomal protein L37a                             | RPL37A  | 2  | 2  | 3.18 | 8.40E-04 |
| K7ERI7     | 60S ribosomal protein L22                              | RPL22   | 5  | 5  | 3.16 | 5.82E-04 |
| P62851     | 40S ribosomal protein S25                              | RPS25   | 8  | 8  | 3.13 | 3.15E-04 |
| Q96PK6     | RNA-binding protein 14                                 | RBM14   | 11 | 11 | 3.13 | 8.95E-03 |
| P08579     | U2 small nuclear ribonucleoprotein B                   | SNRPB2  | 3  | 3  | 3.12 | 6.75E-04 |
| P30050     | 60S ribosomal protein L12                              | RPL12   | 3  | 3  | 3.12 | 3.16E-04 |
| Q722W4-2   | Zinc finger CCCH-type antiviral protein 1              | ZC3HAV1 | 6  | 6  | 3.12 | 1.03E-03 |
| Q9H650     | Probable ATP-dependent RNA helicase YTHDC2             | YTHDC2  | 10 | 10 | 3.09 | 1.24E-04 |
| Q9P2N5     | RNA-binding protein 27                                 | RBM27   | 4  | 4  | 3.09 | 5.99E-04 |
| B5MCF9     | Pescadillo homolog                                     | PES1    | 5  | 5  | 3.07 | 5.22E-04 |
| B1ANR0     | Polyadenylate-binding protein 4                        | PABPC4  | 10 | 10 | 3.06 | 6.48E-03 |
| Q9GZR7-2   | ATP-dependent RNA helicase DDX24                       | DDX24   | 2  | 2  | 3.05 | 9.06E-03 |
| P67809     | Nuclease-sensitive element-binding protein 1           | YBX1    | 13 | 9  | 3.04 | 8.89E-04 |
| Q92615     | La-related protein 4B                                  | LARP4B  | 6  | 6  | 3.03 | 1.07E-03 |
| P17844     | Probable ATP-dependent RNA helicase DDX5               | DDX5    | 22 | 22 | 3.00 | 4.13E-03 |
| P62249     | 40S ribosomal protein S16                              | RPS16   | 16 | 16 | 2.96 | 1.20E-03 |
| P62269     | 40S ribosomal protein S18                              | RPS18   | 15 | 15 | 2.93 | 5.86E-04 |
| P46783     | 40S ribosomal protein S10                              | RPS10   | 14 | 14 | 2.90 | 1.57E-05 |
| Q9BY77     | Polymerase delta-interacting protein 3                 | POLDIP3 | 9  | 9  | 2.90 | 3.73E-03 |
| P19338     | Nucleolin                                              | NCL     | 30 | 30 | 2.83 | 3.62E-03 |
| P23396     | 40S ribosomal protein S3                               | RPS3    | 27 | 27 | 2.82 | 2.38E-04 |
| Q96DH6     | RNA-binding protein Musashi homolog 2                  | MSI2    | 3  | 3  | 2.82 | 5.54E-03 |
| Q9BQG0     | Myb-binding protein 1A                                 | MYBBP1A | 14 | 14 | 2.80 | 7.79E-03 |
| D6RAN4     | 60S ribosomal protein L9                               | RPL9    | 7  | 7  | 2.78 | 2.23E-05 |
| P37108     | Signal recognition particle 14 kDa protein             | SRP14   | 3  | 3  | 2.76 | 3.48E-04 |
| Q14694     | Ubiquitin carboxyl-terminal hydrolase 10               | USP10   | 3  | 3  | 2.74 | 3.52E-03 |
| Q9BZE4     | Nucleolar GTP-binding protein 1                        | GTPBP4  | 6  | 6  | 2.73 | 2.34E-03 |
| P62913     | 60S ribosomal protein L11                              | RPL11   | 6  | 2  | 2.71 | 2.49E-05 |
| P56270-2   | Myc-associated zinc finger protein                     | MAZ     | 3  | 3  | 2.70 | 4.71E-03 |
| Q15233     | Non-POU domain-containing octamer-binding protein      | NONO    | 20 | 20 | 2.70 | 7.35E-03 |
| P60866     | 40S ribosomal protein S20                              | RPS20   | 6  | 6  | 2.67 | 3.12E-05 |
| Q9BQ70     | Transcription factor 25                                | TCF25   | 3  | 3  | 2.66 | 9.83E-03 |
| Q9P270     | SLAIN motif-containing protein 2                       | SLAIN2  | 2  | 2  | 2.65 | 2.85E-03 |
| Q14684-2   | Ribosomal RNA processing protein 1 homolog B           | RRP1B   | 11 | 11 | 2.65 | 3.52E-04 |
| Q86XZ4     | Spermatogenesis-associated serine-rich protein 2       | SPATS2  | 5  | 5  | 2.63 | 4.50E-04 |
| P62701     | 40S ribosomal protein S4, X isoform                    | RPS4X   | 25 | 25 | 2.59 | 2.45E-04 |
| P05387     | 60S acidic ribosomal protein P2                        | RPLP2   | 7  | 7  | 2.57 | 9.12E-04 |
| Q9NZB2-4   | Constitutive coactivator of PPAR-gamma-like protein 1  | FAM120A | 10 | 10 | 2.57 | 9.17E-03 |
| Q01081-4   | Splicing factor U2AF 35 kDa subunit                    | U2AF1   | 1  | 1  | 2.56 | 4.24E-03 |
| Q12906     | Interleukin enhancer-binding factor 3                  | ILF3    | 11 | 11 | 2.55 | 5.13E-03 |
| Q13151     | Heterogeneous nuclear ribonucleoprotein A0             | HNRNPA0 | 11 | 11 | 2.55 | 1.39E-03 |
| MOR0F0     | 40S ribosomal protein S5                               | RPS5    | 14 | 14 | 2.53 | 9.06E-05 |
| P78316     | Nucleolar protein 14                                   | NOP14   | 6  | 6  | 2.53 | 1.40E-03 |
| Q5JR95     | 40S ribosomal protein S8                               | RPS8    | 9  | 9  | 2.52 | 1.23E-04 |
| Q7KZ17-10  | Serine/threonine-protein kinase MARK2                  | MARK2   | 4  | 4  | 2.51 | 7.94E-03 |
| HOY3N9     | Histone lysine demethylase PHF8                        | PHF8    | 6  | 6  | 2.51 | 9.71E-04 |
| POCW22     | 40S ribosomal protein S17-like                         | RPS17L  | 10 | 10 | 2.49 | 6.07E-05 |
| Q8NCA5-2   | Protein FAM98A                                         | FAM98A  | 4  | 4  | 2.48 | 3.75E-04 |
| F8W617     | Heterogeneous nuclear ribonucleoprotein A1             | HNRNPA1 | 20 | 20 | 2.48 | 7.35E-04 |
| P42766     | 60S ribosomal protein L35                              | RPL35   | 6  | 6  | 2.47 | 3.83E-06 |
| Q2NL82     | Pre-rRNA-processing protein TSR1 homolog               | TSR1    | 3  | 3  | 2.46 | 5.38E-03 |
| Q9BXS6-2   | Nucleolar and spindle-associated protein 1             | NUSAP1  | 8  | 1  | 2.45 | 1.38E-03 |
| C9JTT7     | Replication factor C subunit 4                         | RFC4    | 4  | 4  | 2.45 | 4.97E-03 |
| O00411     | DNA-directed RNA polymerase, mitochondrial             | POLRMT  | 15 | 15 | 2.43 | 3.48E-04 |
| P62841     | 40S ribosomal protein S15                              | RPS15   | 6  | 6  | 2.41 | 2.73E-04 |
| F8W7C6     | 60S ribosomal protein L10                              | RPL10   | 6  | 6  | 2.41 | 6.81E-04 |
| A0A024RAC6 | Transcription elongation factor B polypeptide 3        | TCEB3   | 9  | 9  | 2.41 | 7.58E-04 |
| Q9NZI8     | Insulin-like growth factor 2 mRNA-binding protein 1    | IGF2BP1 | 19 | 17 | 2.38 | 1.07E-03 |
| Q92841     | Probable ATP-dependent RNA helicase DDX17              | DDX17   | 27 | 22 | 2.38 | 4.62E-04 |
| Q9HCM4-2   | Band 4.1-like protein 5                                | EPB41L5 | 2  | 2  | 2.37 | 6.23E-03 |
| Q96EL3     | 39S ribosomal protein L53, mitochondrial               | MRPL53  | 2  | 2  | 2.36 | 7.24E-04 |
| P39019     | 40S ribosomal protein S19                              | RPS19   | 20 | 20 | 2.32 | 6.94E-04 |
| P61254     | 60S ribosomal protein L26                              | RPL26   | 6  | 6  | 2.32 | 1.00E-04 |
| O43395     | U4/U6 small nuclear ribonucleoprotein Prp3             | PRPF3   | 6  | 6  | 2.31 | 1.23E-03 |
| P46776     | 60S ribosomal protein L27a                             | RPL27A  | 4  | 4  | 2.25 | 2.87E-05 |
| P40938-2   | Replication factor C subunit 3                         | RFC3    | 4  | 4  | 2.25 | 3.38E-03 |
| Q96SB4-4   | SRSF protein kinase 1                                  | SRPK1   | 6  | 6  | 2.24 | 8.52E-03 |
| MOQZC5     | 40S ribosomal protein S11                              | RPS11   | 13 | 13 | 2.24 | 3.15E-03 |
| QSJTH9-2   | RRP12-like protein                                     | RRP12   | 7  | 7  | 2.23 | 9.72E-04 |
| O94761     | ATP-dependent DNA helicase Q4                          | RECQL4  | 2  | 2  | 2.22 | 7.91E-03 |
| Q92522     | Histone H1x                                            | H1FX    | 7  | 7  | 2.21 | 8.41E-06 |
| P62750     | 60S ribosomal protein L23a                             | RPL23A  | 11 | 11 | 2.20 | 4.73E-06 |

|            |                                                      |           |    |    |      |          |
|------------|------------------------------------------------------|-----------|----|----|------|----------|
| P25398     | 40S ribosomal protein S12                            | RPS12     | 5  | 5  | 2.19 | 1.35E-04 |
| P11940     | Polyadenylate-binding protein 1                      | PABPC1    | 21 | 15 | 2.17 | 7.78E-03 |
| Q00059     | Transcription factor A, mitochondrial                | TFAM      | 9  | 9  | 2.15 | 3.85E-03 |
| P62081     | 40S ribosomal protein S7                             | RPS7      | 11 | 11 | 2.14 | 6.95E-04 |
| A0A0B4J210 | La-related protein 1                                 | LARP1     | 11 | 11 | 2.12 | 2.36E-03 |
| C9JXB8     | 60S ribosomal protein L24                            | RPL24     | 4  | 4  | 2.09 | 1.79E-04 |
| P62266     | 40S ribosomal protein S23                            | RPS23     | 3  | 3  | 2.09 | 2.24E-03 |
| D3YTB1     | 60S ribosomal protein L32                            | RPL32     | 4  | 4  | 2.08 | 4.48E-03 |
| Q13724-2   | Mannosyl-oligosaccharide glucosidase                 | MOGS      | 9  | 9  | 2.07 | 2.60E-03 |
| P27448-6   | MAP/microtubule affinity-regulating kinase 3         | MARK3     | 7  | 6  | 2.04 | 3.38E-03 |
| P35637-2   | RNA-binding protein FUS                              | FUS       | 15 | 13 | 2.04 | 1.11E-03 |
| B4DLN1     | 39S ribosomal protein L12, mitochondrial             | SLC25A10  | 6  | 6  | 2.00 | 2.85E-03 |
| Q9BVI4     | Nucleolar complex protein 4 homolog                  | NOC4L     | 5  | 5  | 1.96 | 5.02E-03 |
| G3XAC6     | RNA-binding protein 39                               | RBM39     | 9  | 9  | 1.96 | 2.21E-05 |
| Q9NSI2-2   | Protein FAM207A                                      | FAM207A   | 8  | 8  | 1.95 | 3.69E-03 |
| P62277     | 40S ribosomal protein S13                            | RPS13     | 12 | 12 | 1.94 | 1.84E-03 |
| Q08211     | ATP-dependent RNA helicase A                         | DHX9      | 32 | 32 | 1.93 | 3.39E-06 |
| A0A087WXM6 | 60S ribosomal protein L17                            | RPL17     | 11 | 11 | 1.93 | 3.06E-05 |
| P62753     | 40S ribosomal protein S6                             | RPS6      | 9  | 9  | 1.92 | 4.63E-04 |
| O43172-2   | U4/U6 small nuclear ribonucleoprotein Prp4           | PRPF4     | 4  | 4  | 1.87 | 9.76E-03 |
| Q14493     | Histone RNA hairpin-binding protein                  | SLBP      | 2  | 2  | 1.84 | 9.93E-03 |
| P51991     | Heterogeneous nuclear ribonucleoprotein A3           | HNRNPA3   | 16 | 3  | 1.84 | 2.90E-03 |
| Q01844-6   | RNA-binding protein EWS                              | EWSR1     | 6  | 6  | 1.83 | 4.24E-04 |
| P15880     | 40S ribosomal protein S2                             | RPS2      | 14 | 14 | 1.83 | 1.97E-03 |
| P62244     | 40S ribosomal protein S15a                           | RPS15A    | 9  | 9  | 1.81 | 1.79E-03 |
| Q3KQU3-2   | MAP7 domain-containing protein 1                     | MAP7D1    | 5  | 5  | 1.81 | 5.38E-03 |
| A0A0D9SFB3 | ATP-dependent RNA helicase DDX3X                     | DDX3X     | 31 | 29 | 1.79 | 1.32E-04 |
| P22626     | Heterogeneous nuclear ribonucleoproteins A2/B1       | HNRNPA2B1 | 23 | 23 | 1.78 | 5.09E-04 |
| HOY6E7     | RNA-binding motif protein, X chromosome              | RBMX      | 8  | 8  | 1.78 | 2.79E-03 |
| O60506-3   | Heterogeneous nuclear ribonucleoprotein Q            | SYNCRIP   | 11 | 8  | 1.77 | 7.88E-03 |
| Q8WWY3     | U4/U6 small nuclear ribonucleoprotein Prp31          | PRPF31    | 6  | 6  | 1.75 | 7.32E-03 |
| P63173     | 60S ribosomal protein L38                            | RPL38     | 7  | 7  | 1.75 | 1.21E-03 |
| P62847-2   | 40S ribosomal protein S24                            | RPS24     | 7  | 7  | 1.75 | 2.37E-04 |
| Q8IWZ3-6   | Ankyrin repeat and KH domain-containing protein 1    | ANKHD1    | 6  | 6  | 1.74 | 9.96E-03 |
| O43390     | Heterogeneous nuclear ribonucleoprotein R            | HNRNPR    | 7  | 7  | 1.73 | 1.43E-04 |
| Q86V81     | THO complex subunit 4                                | ALYREF    | 8  | 1  | 1.71 | 8.68E-03 |
| P46781     | 40S ribosomal protein S9                             | RPS9      | 15 | 15 | 1.68 | 8.81E-04 |
| Q9H1R3     | Myosin light chain kinase 2, skeletal/cardiac muscle | MYLK2     | 3  | 3  | 1.66 | 9.84E-03 |
| P62854     | 40S ribosomal protein S26                            | RPS26     | 4  | 4  | 1.65 | 4.20E-03 |
| Q13123     | Protein Red                                          | IK        | 6  | 6  | 1.62 | 1.19E-05 |
| Q13895     | Bystin                                               | BYSL      | 9  | 9  | 1.62 | 1.39E-03 |
| P62263     | 40S ribosomal protein S14                            | RPS14     | 9  | 9  | 1.61 | 4.59E-03 |
| D6R9P3     | Heterogeneous nuclear ribonucleoprotein A/B          | HNRNPAB   | 9  | 9  | 1.54 | 1.76E-03 |
| Q01105-3   | Protein SET                                          | SET       | 3  | 3  | 1.51 | 5.78E-03 |
| Q5RKV6     | Exosome complex component MTR3                       | EXOSC6    | 2  | 2  | 1.51 | 2.40E-03 |
| HOYA96     | Heterogeneous nuclear ribonucleoprotein D0           | HNRNPD    | 7  | 5  | 1.45 | 4.86E-03 |
| P09874     | Poly [ADP-ribose] polymerase 1                       | PARP1     | 13 | 13 | 1.37 | 1.29E-04 |
| Q00839-2   | Heterogeneous nuclear ribonucleoprotein U            | HNRNPU    | 28 | 28 | 1.37 | 5.02E-03 |
| A0A087X2D0 | Serine/arginine-rich splicing factor 3               | SRSF3     | 5  | 5  | 1.13 | 1.33E-04 |
| B4DY09     | Interleukin enhancer-binding factor 2                | ILF2      | 6  | 6  | 1.02 | 1.71E-03 |

### Supplementary Table S2

Binding free energy differences ( $\Delta\Delta G$  in kcal/mol) of TARG1 mutants in complex with ADPr ( $\Delta\Delta G = \Delta G_{\text{wildtype}} - \Delta G_{\text{mutant}}$ ).

|                        | <b>E<sup>b</sup></b>     | <b>L</b>     | <b>R</b>     |
|------------------------|--------------------------|--------------|--------------|
| <b>G19<sup>a</sup></b> | 12.8                     | 13.2         | 13.3         |
| <b>D20</b>             | 12.9                     | 10.1         | 8.7          |
| <b>L21</b>             | -10.2                    | /            | 25.6         |
| <b>F22</b>             | 8.8                      | 0.5          | 1.2          |
| <b>H32</b>             | 12.7                     | 6.0          | 17.8         |
| <b>C33</b>             | 2.8                      | 4.7          | 4.3          |
| <b>I34</b>             | 0.1                      | 4.6          | 5.5          |
| <b>S35</b>             | -12.5                    | -6.5         | 5.4          |
| <b>R39</b>             | 11.1                     | -9.3         | /            |
| <b>M40</b>             | 11.8                     | 3.1          | 13.9         |
| <b>A42</b>             | 0.0                      | -9.7         | 4.5          |
| <b>G43</b>             | <b>-16.3<sup>c</sup></b> | <b>-15.1</b> | <b>-15.7</b> |
| <b>I44</b>             | <b>-18.9</b>             | -10.7        | <b>-18.9</b> |
| <b>A45</b>             | <b>-18.9</b>             | 11.5         | <b>-18.9</b> |
| <b>L47</b>             | 10.1                     | /            | 5.1          |
| <b>T83</b>             | 6.6                      | 4.7          | -6.6         |
| <b>A87</b>             | -8.3                     | -9.6         | 6.1          |
| <b>R119</b>            | 8.6                      | 11.8         | /            |
| <b>I120</b>            | 3.4                      | 6.6          | 13.8         |
| <b>G121</b>            | 2.5                      | 15.7         | 18.8         |
| <b>C122</b>            | 10.7                     | 3.6          | -9.3         |
| <b>G123</b>            | <b>-18.9</b>             | <b>-18.9</b> | <b>-18.9</b> |
| <b>L124</b>            | 5.1                      | /            | 6.1          |
| <b>D125</b>            | -8.4                     | 12.6         | 12.1         |
| <b>Y150</b>            | 10.9                     | 12.9         | 12.2         |
| <b>T151</b>            | 10.6                     | 11.6         | 12.7         |
| <b>L152</b>            | 6.0                      | /            | 11.4         |

<sup>a</sup> The residues of TARG1 within ADPr binding pocket (by 5 Å).

<sup>b</sup> Each residue was mutated to glutamate (E), leucine (L), and arginine (R).

<sup>c</sup> The potent mutations ( $\Delta\Delta G < -15$  kcal/mol) were highlighted in bold fonts.



## Supplementary Table S3

### Complete gene ontology analyses of TARG1 interacting proteins

Proteins that were upregulated at least 10-fold in TAP-TARG1 pulldowns over TAP-tag alone with and without olaparib were analyzed for statistical overrepresentation of gene ontology (GO) terms using PANTHER GO-Slim annotation data sets (PANTHER version 13.0, release 2017-11-12, analysis type PANTHER Overrepresentation Test, released 20171205) for “biological process”, “molecular function” or “cellular component”, sorted by false discovery rate (FDR; Reference list: Homo sapiens, test type: Fisher’s Exact with FDR multiple test correction, FDR<0.05).

| + Olaparib                                                    | Homo sapiens REF # | Input # | Expected | Fold enrichment | Raw p-value | FDR      |
|---------------------------------------------------------------|--------------------|---------|----------|-----------------|-------------|----------|
| <b>PANTHER GO-Slim Biological Process</b>                     |                    |         |          |                 |             |          |
| translation (GO:0006412)                                      | 141                | 10      | .42      | 24.07           | 2.04E-11    | 4.97E-09 |
| cellular component biogenesis (GO:0044085)                    | 504                | 13      | 1.49     | 8.75            | 2.74E-09    | 3.34E-07 |
| rRNA metabolic process (GO:0016072)                           | 111                | 6       | .33      | 18.35           | 1.22E-06    | 7.43E-05 |
| cellular component organization or biogenesis (GO:0071840)    | 1685               | 18      | 4.96     | 3.63            | 1.14E-06    | 9.27E-05 |
| RNA metabolic process (GO:0016070)                            | 1023               | 11      | 3.01     | 3.65            | 1.89E-04    | 9.23E-03 |
| biosynthetic process (GO:0009058)                             | 1659               | 14      | 4.89     | 2.86            | 2.85E-04    | 1.16E-02 |
| organelle organization (GO:0006996)                           | 1152               | 11      | 3.39     | 3.24            | 5.17E-04    | 1.80E-02 |
| nucleobase-containing compound metabolic process (GO:0006139) | 2050               | 15      | 6.04     | 2.48            | 7.52E-04    | 2.29E-02 |
| chromatin organization (GO:0006325)                           | 255                | 5       | .75      | 6.65            | 9.97E-04    | 2.70E-02 |
| primary metabolic process (GO:0044238)                        | 4346               | 24      | 12.81    | 1.87            | 1.34E-03    | 3.27E-02 |
| <b>PANTHER GO-Slim Molecular Function</b>                     |                    |         |          |                 |             |          |
| structural constituent of ribosome (GO:0003735)               | 123                | 18      | .36      | 49.67           | 3.31E-25    | 6.28E-23 |
| structural molecule activity (GO:0005198)                     | 480                | 18      | 1.41     | 12.73           | 2.69E-15    | 2.56E-13 |
| RNA binding (GO:0003723)                                      | 415                | 11      | 1.22     | 9.00            | 4.02E-08    | 2.54E-06 |
| nucleic acid binding (GO:0003676)                             | 1612               | 17      | 4.75     | 3.58            | 2.93E-06    | 1.39E-04 |
| DNA binding (GO:0003677)                                      | 262                | 6       | .77      | 7.77            | 1.34E-04    | 5.11E-03 |
| RNA helicase activity (GO:0003724)                            | 34                 | 3       | .10      | 29.95           | 1.75E-04    | 5.53E-03 |
| mRNA binding (GO:0003729)                                     | 117                | 4       | .34      | 11.60           | 4.44E-04    | 1.05E-02 |
| helicase activity (GO:0004386)                                | 67                 | 3       | .20      | 15.20           | 1.15E-03    | 2.43E-02 |
| Unclassified (UNCLASSIFIED)                                   | 12190              | 22      | 35.92    | .61             | 4.37E-04    | 1.18E-02 |
| <b>PANTHER GO-Slim Cellular Component</b>                     |                    |         |          |                 |             |          |
| ribosome (GO:0005840)                                         | 156                | 23      | .46      | 50.04           | 2.37E-32    | 7.46E-31 |
| ribonucleoprotein complex (GO:0030529)                        | 415                | 29      | 1.22     | 23.72           | 2.03E-32    | 1.28E-30 |
| cytosol (GO:0005829)                                          | 468                | 24      | 1.38     | 17.40           | 1.63E-23    | 3.42E-22 |
| macromolecular complex (GO:0032991)                           | 2153               | 32      | 6.34     | 5.04            | 4.90E-16    | 7.71E-15 |
| organelle (GO:0043226)                                        | 3734               | 33      | 11.00    | 3.00            | 3.13E-10    | 3.94E-09 |
| cytoplasm (GO:0005737)                                        | 2927               | 28      | 8.62     | 3.25            | 2.95E-09    | 3.09E-08 |
| intracellular (GO:0005622)                                    | 4976               | 36      | 14.66    | 2.46            | 7.30E-09    | 6.57E-08 |
| cell part (GO:0044464)                                        | 6050               | 36      | 17.83    | 2.02            | 1.69E-06    | 1.33E-05 |
| Unclassified (UNCLASSIFIED)                                   | 14246              | 25      | 41.98    | .60             | 1.44E-05    | 1.01E-04 |
| nucleolus (GO:0005730)                                        | 113                | 5       | .33      | 15.02           | 2.52E-05    | 1.59E-04 |
| <b>- Olaparib</b>                                             |                    |         |          |                 |             |          |
| <b>PANTHER GO-Slim Biological Process</b>                     |                    |         |          |                 |             |          |
| DNA metabolic process (GO:0006259)                            | 381                | 12      | .65      | 18.41           | 1.25E-12    | 3.05E-10 |
| DNA repair (GO:0006281)                                       | 162                | 8       | .28      | 28.86           | 3.79E-10    | 4.62E-08 |
| nitrogen compound metabolic process (GO:0006807)              | 2435               | 18      | 4.17     | 4.32            | 1.64E-08    | 1.33E-06 |
| response to stress (GO:0006950)                               | 684                | 10      | 1.17     | 8.55            | 1.64E-07    | 1.00E-05 |
| nucleobase-containing compound metabolic process (GO:0006139) | 2050               | 15      | 3.51     | 4.28            | 5.28E-07    | 2.58E-05 |
| chromatin organization (GO:0006325)                           | 255                | 6       | .44      | 13.75           | 4.85E-06    | 1.97E-04 |
| response to abiotic stimulus (GO:0009628)                     | 75                 | 4       | .13      | 31.17           | 9.83E-06    | 3.43E-04 |

|                                                            |      |    |      |       |          |          |
|------------------------------------------------------------|------|----|------|-------|----------|----------|
| organelle organization (GO:0006996)                        | 1152 | 9  | 1.97 | 4.57  | 1.10E-04 | 3.36E-03 |
| metabolic process (GO:0008152)                             | 5416 | 20 | 9.27 | 2.16  | 1.60E-04 | 3.91E-03 |
| DNA replication (GO:0006260)                               | 156  | 4  | .27  | 14.99 | 1.56E-04 | 4.23E-03 |
| biosynthetic process (GO:0009058)                          | 1659 | 10 | 2.84 | 3.52  | 3.54E-04 | 7.85E-03 |
| cellular component organization (GO:0016043)               | 1543 | 9  | 2.64 | 3.41  | 9.47E-04 | 1.93E-02 |
| primary metabolic process (GO:0044238)                     | 4346 | 16 | 7.44 | 2.15  | 1.36E-03 | 2.55E-02 |
| cellular component organization or biogenesis (GO:0071840) | 1685 | 9  | 2.88 | 3.12  | 1.76E-03 | 3.06E-02 |
| chromatin assembly (GO:0031497)                            | 40   | 2  | .07  | 29.23 | 2.34E-03 | 3.81E-02 |
| regulation of cell cycle (GO:0051726)                      | 164  | 3  | .28  | 10.69 | 2.88E-03 | 4.39E-02 |
| DNA recombination (GO:0006310)                             | 49   | 2  | .08  | 23.86 | 3.43E-03 | 4.92E-02 |
| <b>PANTHER GO-Slim Molecular Function</b>                  |      |    |      |       |          |          |
| DNA binding (GO:0003677)                                   | 262  | 10 | .45  | 22.31 | 2.05E-11 | 3.90E-09 |
| nucleic acid binding (GO:0003676)                          | 1612 | 12 | 2.76 | 4.35  | 9.18E-06 | 8.72E-04 |
| <b>PANTHER GO-Slim Cellular Component</b>                  |      |    |      |       |          |          |
| chromosome (GO:0005694)                                    | 201  | 11 | .34  | 31.99 | 3.96E-14 | 2.49E-12 |
| nucleus (GO:0005634)                                       | 1839 | 18 | 3.15 | 5.72  | 1.82E-10 | 5.75E-09 |
| nuclear chromosome (GO:0000228)                            | 136  | 7  | .23  | 30.08 | 4.04E-09 | 8.49E-08 |
| organelle (GO:0043226)                                     | 3734 | 18 | 6.39 | 2.82  | 1.05E-05 | 1.65E-04 |
| protein-DNA complex (GO:0032993)                           | 31   | 3  | .05  | 56.56 | 2.64E-05 | 3.33E-04 |
| intracellular (GO:0005622)                                 | 4976 | 18 | 8.51 | 2.11  | 5.92E-04 | 6.21E-03 |
| macromolecular complex (GO:0032991)                        | 2153 | 10 | 3.68 | 2.71  | 2.64E-03 | 2.38E-02 |

## Supplementary Methods

### In silico mutational analyses

*Conservation Analyses.* Multiple sequence alignment on the residues of the ADPr binding sites were carried out among TARG1, MacroD2, MacroD1, AF1521 and MacroH2A using Clustal Omega <sup>4</sup>. From this procedure, three conserved or strongly similar residues across the selected macrodomains were identified, G43, I44 and G123 (Supplementary Fig S1 B).

*In silico alanine scanning.* The ABS-Scan web-server <sup>5</sup> systematically evaluates amino acids for their importance in protein-ligand interactions by in silico alanine-scanning mutagenesis. The crystal structure of TARG1 (PDBID 4J5S) was used as starting structure <sup>6</sup>. A distance cut-off of 5 Å was chosen to define the binding site around the ADPr. For each residue within the cut-off, all side chain atoms beyond C<sub>β</sub> were removed and the missing hydrogen was added, obtaining an alanine side chain. The method relies on two assumptions: (i) The introduced point mutation does not drastically change the structure of the protein and (ii) the mode of ligand interaction is unchanged <sup>5</sup>. Modeler library was used on all selected residues, coupled with steps of energy minimization to ensure that no steric clashes occur between protein and ligand atoms <sup>7</sup>. The structural quality of the generated protein structures was estimated through Discrete Optimized Protein Energy (DOPE) score <sup>8</sup>, while the energetics of a protein-ligand complex was scored by using Autodock 4.1 forcefield <sup>9</sup>. The contribution of a specific amino acid is determined by the difference in interaction score of mutant and wild-type protein ( $\Delta\Delta G$  value). From this procedure, I44 emerged as relevant residues for ADPr binding (Supplementary Fig S1 C).

*Computational mutagenesis.* The residues of TARG1 ADPr binding pocket were systematically mutated to glutamate (E), leucine (L), and arginine (R) by using the Swiss-PdbViewer package <sup>10</sup>. In this procedure, the input coordinates of the different amino acids for each residue are minimized using the conjugate gradient method to remove poor contacts. This is followed by molecular dynamics simulation (Langevin dynamics at constant temperature), and a short minimization to obtain the final energy of the system. The AMBER score <sup>11</sup> is calculated as  $E(\text{Complex}) - [E(\text{protein}) + E(\text{Ligand})]$ . The entropic contribution is supposed to be constant since it is assumed that point mutations in the protein do not significantly affect the conformation of the mutated protein, as discussed previously <sup>12</sup>. AMBER score implements molecular mechanics Generalized Born/surface area simulations with traditional general AMBER force field for ligand molecules <sup>13</sup>. The interaction between

the ligand and the protein is represented by electrostatic and van der Waals energy terms, and the solvation energy is calculated using Generalized Born solvation model. From this procedure, the most powerful mutants were the ones from G43, I44, A45, G123 (Supplementary Table S2).

#### Hydrolase assay

Hydrolase assays were performed as described previously<sup>14</sup>.

#### WST-1 cell proliferation assay

$3 \times 10^3$  cells were seeded per well of a 96-well plate  $\pm$  500 ng/ml doxycycline in triplicates. Cell proliferation was measured every 24 h over a course of 4 days using the cell proliferation reagent WST-1 (Roche) according to manufacturer's instructions.

#### Colony formation assay

Stable HeLa Flp-In<sup>TM</sup> T-REx<sup>TM</sup> cells, which were or were not induced with 500 ng/ml doxycycline for 72 h to induce transgene or shRNA expression, were seeded at a density of  $1 \times 10^5$  cells per well in 6-well plates. After 24 h, the cells were treated with hydroxyurea, etoposide or doxorubicin at the indicated concentrations or with diluent as a control. The cell culture medium was exchanged after 24 h (doxorubicin) or after 48 h (hydroxyurea, etoposide) with fresh medium ( $\pm$  doxycycline). The cells were fixed and stained on day 4 after seeding with methylene blue (0.2% in methanol). Cell density was measured using Adobe Photoshop (CS5 Extended V12.0, Adobe Systems Incorporated) and normalized to the cell density of untreated or DMSO-treated cells as a measure for relative cell survival.

#### SUnSET assay<sup>3</sup>

Cells were seeded at a density of  $1 \times 10^5$  cells per well of a 6-well plate and were or were not treated with 100 ng/ml doxycycline to induce HA-TARG1 expression for 48 h. The cells were treated with 10  $\mu$ g/ml puromycin for 10 min at 37°C and were then washed twice with PBS before fresh cell culture medium was added. The cells were incubated for additional 50 min at 37°C, washed with PBS and were harvested for the preparation of whole cell lysates. As a control, cells were treated with 25  $\mu$ g/ml cycloheximide throughout the 10 min pulse labeling period and the 50 min chase period to inhibit translation. An equal volume of each cell lysate was analyzed by SDS-PAGE and Western blotting for incorporation of puromycin into nascent polypeptides using an anti-puromycin antibody (12D10, 1:20,000).

## References

- 1 Peterson, F. C. *et al.* Orphan macrodomain protein (human C6orf130) is an O-acyl-ADP-ribose deacylase: solution structure and catalytic properties. *J Biol Chem* **286**, 35955-35965, doi:10.1074/jbc.M111.276238 (2011).
- 2 Niesen, F. H., Berglund, H. & Vedadi, M. The use of differential scanning fluorimetry to detect ligand interactions that promote protein stability. *Nature protocols* **2**, 2212-2221, doi:10.1038/nprot.2007.321 (2007).
- 3 Schmidt, E. K., Clavarino, G., Ceppi, M. & Pierre, P. SUnSET, a nonradioactive method to monitor protein synthesis. *Nature methods* **6**, 275-277, doi:10.1038/nmeth.1314 (2009).
- 4 Sievers, F. *et al.* Fast, scalable generation of high-quality protein multiple sequence alignments using Clustal Omega. *Molecular systems biology* **7**, 539, doi:10.1038/msb.2011.75 (2011).
- 5 Anand, P., Nagarajan, D., Mukherjee, S. & Chandra, N. ABS-Scan: In silico alanine scanning mutagenesis for binding site residues in protein-ligand complex. *FI000Research* **3**, 214, doi:10.12688/fi000research.5165.2 (2014).
- 6 Sharifi, R. *et al.* Deficiency of terminal ADP-ribose protein glycohydrolase TARG1/C6orf130 in neurodegenerative disease. *Embo J* **32**, 1225-1237, doi:10.1038/emboj.2013.51 (2013).
- 7 Sali, A. & Blundell, T. L. Comparative protein modelling by satisfaction of spatial restraints. *J Mol Biol* **234**, 779-815, doi:10.1006/jmbi.1993.1626 (1993).
- 8 Shen, M. Y. & Sali, A. Statistical potential for assessment and prediction of protein structures. *Protein Sci* **15**, 2507-2524, doi:10.1110/ps.062416606 (2006).
- 9 Huey, R., Morris, G. M., Olson, A. J. & Goodsell, D. S. A semiempirical free energy force field with charge-based desolvation. *Journal of computational chemistry* **28**, 1145-1152, doi:10.1002/jcc.20634 (2007).
- 10 Schwede, T., Kopp, J., Guex, N. & Peitsch, M. C. SWISS-MODEL: An automated protein homology-modeling server. *Nucleic Acids Res* **31**, 3381-3385 (2003).
- 11 Graves, A. P. *et al.* Rescoring docking hit lists for model cavity sites: predictions and experimental testing. *J Mol Biol* **377**, 914-934, doi:10.1016/j.jmb.2008.01.049 (2008).
- 12 Massova, I. & Kollman, P. A. Computational Alanine Scanning To Probe Protein-Protein Interactions: A Novel Approach To Evaluate Binding Free Energies. . *Am. Chem. Soc.* **121**, 8133-8143 (1999).
- 13 Wang, J., Wolf, R. M., Caldwell, J. W., Kollman, P. A. & Case, D. A. Development and testing of a general amber force field. *Journal of computational chemistry* **25**, 1157-1174, doi:10.1002/jcc.20035 (2004).
- 14 Eckeï, L. *et al.* The conserved macrodomains of the non-structural proteins of Chikungunya virus and other pathogenic positive strand RNA viruses function as mono-ADP-ribosylhydrolases. *Sci Rep* **7**, 41746, doi:10.1038/srep41746 (2017).
